# Supplementary material for: Genomic Characterization of ESBL-producing Escherichia coli Isolates Belonging to a Hybrid aEPEC/ExPEC Pathotype O153:H10-A-ST10 eae-beta1 Occurred in Human Diarrheagenic Isolates, Meat, Poultry and Wildlife
Source: Preprints.org preprint supplement (doi:10.20944/preprints202003.0448.v1), 2020-03-31
Supplement: Supplementary file 1 [file supplementary]

Supplementary data

Genomic characterization of ESBL-producing *Escherichia coli* isolates belonging to a hybrid aEPEC/ExPEC pathotype O153:H10-A-ST10 *eae*-beta1 occurred in human diarrheagenic isolates, meat, poultry and wildlife

Dafne Díaz-Jiménez 1+, Isidro García-Meniño 1+, Alexandra Herrera 1, Vanesa García 1,4, Ana María López-Beceiro 2, María Pilar Alonso 3, Jorge Blanco 1, and Azucena Mora 1,*

**Table S1.** Thirty-two isolates included in the study (in red) from our own collections

| **Origin of isolation** | **Sampling period** | **No. ESBL aEPEC O153 isolates / total ESBL isolates a** | **No. NON-ESBL**  **aEPEC O153 isolatesb** |
| --- | --- | --- | --- |
| Chicken meat study | 2009-2010 | **7** / 127 | NA |
| Beef meat 1st study | 2005-2009 | **5** / DNA | **2** |
| Beef meat 2nd study | 2011-2012 | **1** / 5 | NA |
| Pork meat study | 2011-2012 | **1** / 13 | NA |
| Poultry farm environment | 2010-2012 | **1** / 96 | NA |
| Wildlife study | 2014-2015 | **1** / 95 | NA |
| Human diarrhea | 2006-2012 | **5** / DNA | **9** |

a Data not available (DNA); b Not analyzed (NA)

**Table S2.** Assembly data from Enterobase of the 17 O153:H10-A-ST10 genomes sequenced using Illumina NextSeq technology

| **Code** | **Assembly barcode** | **Coverage** | **N50** | **Length** | **Contig No.**  **(>=200 bp)** | **ST_ 7 gene** | **ST Complex** | **wgMLST**  **25,002 loci** | **cgMLST**  **2,513 loci** | **rST**  **53 loci** | **O antigen prediction** | **H antigen prediction** |
| --- | --- | --- | --- | --- | --- | --- | --- | --- | --- | --- | --- | --- |
| LREC-110 | ESC_KA7423AA_AS | 361 | 147271 | 5152970 | 178 | 10 | ST10 Cplx | 38372 | 37600 | 2021 | O153 | H10 |
| LREC-111 | ESC_KA7425AA_AS | 370 | 126323 | 5239837 | 221 | 10 | ST10 Cplx | 38373 | 37601 | 2021 | O153 | H10 |
| LREC-112 | ESC_KA7429AA_AS | 124 | 109355 | 5084929 | 342 | 10 | ST10 Cplx | 38377 | 37605 | 2021 | O153 | H10 |
| LREC-113 | ESC_KA7430AA_AS | 92 | 93205 | 5172711 | 213 | 10 | ST10 Cplx | 38378 | 37606 | 2021 | O153 | H10 |
| LREC-114 | ESC_KA7438AA_AS | 163 | 126323 | 5201046 | 213 | 10 | ST10 Cplx | 38386 | 37614 | 2021 | O153 | H10 |
| LREC-115 | ESC_KA7437AA_AS | 141 | 126291 | 5232022 | 228 | 10 | ST10 Cplx | 38385 | 37613 | 2021 | O153 | H10 |
| LREC-116 | ESC_KA7436AA_AS | 118 | 124442 | 5187480 | 212 | 10 | ST10 Cplx | 38384 | 37612 | 2021 | O153 | H10 |
| LREC-117 | ESC_KA7433AA_AS | 163 | 124771 | 5160744 | 169 | 10 | ST10 Cplx | 38381 | 37609 | 2021 | O153 | H10 |
| LREC-118 | ESC_KA7706AA_AS | 39 | 69529 | 5166783 | 292 | 10 | ST10 Cplx | 39187 | 38299 | 2021 | O153 | H10 |
| LREC-119 | ESC_KA7435AA_AS | 296 | 125664 | 4994631 | 189 | 10 | ST10 Cplx | 38383 | 37611 | 2021 | O153 | H10 |
| LREC-120 | ESC_KA7432AA_AS | 150 | 102481 | 5263192 | 230 | 10 | ST10 Cplx | 38379 | 37607 | 2021 | - | H10 |
| LREC-121 | ESC_KA7434AA_AS | 71 | 73833 | 5134535 | 170 | 10 | ST10 Cplx | 38382 | 37610 | 2021 | - | H10 |
| LREC-122 | ESC_KA7440AA_AS | 168 | 124771 | 5209684 | 223 | 10 | ST10 Cplx | 38388 | 37616 | 2021 | O153 | H10 |
| LREC-123 | ESC_KA7439AA_AS | 78 | 123102 | 5208501 | 253 | 10 | ST10 Cplx | 38387 | 37615 | 2021 | O153 | H10 |
| LREC-124 | ESC_KA7441AA_AS | 201 | 119599 | 5258246 | 171 | 10 | ST10 Cplx | 38389 | 37617 | 2021 | O153 | H10 |
| LREC-125 | ESC_KA7442AA_AS | 166 | 119599 | 5274856 | 272 | 10 | ST10 Cplx | 38390 | 37618 | 2021 | O153 | H10 |
| LREC-127 | ESC_KA7426AA_AS | 208 | 126318 | 5253322 | 213 | 10 | ST10 Cplx | 38374 | 37602 | 58738 | O153 | H10 |

Raw reads were uploaded and automatically assembled in Enterobase (<https://enterobase.warwick.ac.uk/>) using SPAdes Genome Assembler v3.5. with a threshold on contigs of minimum 200 nt. Subsequently, the *de novo* assembled contigs were MLST (7 gene ST, wgST, cgST and rST) and serotype predicted using Enterobase typing tools

**Table S3.** HierCC designations from Enterobase for the 17 Spanish collection and other 7 related genomes within each cluster group. SNPs of the core genomic regions

| **Name**  **(Enterobase)** | **Source**  **Details a** | **Collection Year a** | **Country**  **a** | **O Antigen** | **H Antigen** | **ST** | **Lineage** | **fimH allele** | **cgMLST** | **HC0** | **HC2** | **HC5** | **HC10** | **HC20** | **HC50** | **HC100** | **HC200** | **HC400** | **SNPs b** |
| --- | --- | --- | --- | --- | --- | --- | --- | --- | --- | --- | --- | --- | --- | --- | --- | --- | --- | --- | --- |
| 110084 | DNA | DNA | DNA | O5 | H27 | 10 | A | 54 | 8886 | 8886 | 8886 | 8886 | 8886 | 8886 | 8886 | 8886 | 8886 | 8224 |  |
| 166357 | Human; Homo sapiens | 2015 | United Kingdom | O40 | H10 | 10 | A | 54 | 21500 | 21500 | 21500 | 21500 | 21500 | 21500 | 21500 | 21500 | 8224 | 8224 |  |
| 208917 | Human; Homo sapiens | 2016 | United Kingdom | O40 | H10 | 10 | A | 54 | 21361 | 21361 | 21361 | 21361 | 21361 | 21361 | 21361 | 21361 | 8839 | 8224 |  |
| 853984 | Homo sapiens; human | 2019 | United Kingdom | O153 | H10 | 10 | A | 54 | 124093 | 124093 | 124093 | 124093 | 124093 | 124093 | 124093 | 37600 | 8224 | 8224 |  |
| 866428 | Homo sapiens; human | 2019 | United Kingdom | O153 | H10 | 10 | A | 54 | 129194 | 129194 | 129194 | 129194 | 129194 | 129194 | 124093 | 37600 | 8224 | 8224 |  |
| AM_LREC-110 | Chicken meat | 2010 | Spain | O153 | H10 | 10 | A | 54 | 37600 | 37600 | 37600 | 37600 | 37600 | 37600 | 37600 | 37600 | 8224 | 8224 | 37 |
| AM_LREC-111 | Fox faeces | 2015 | Spain | O153 | H10 | 10 | A | 54 | 37601 | 37601 | 37601 | 37601 | 37601 | 37601 | 37600 | 37600 | 8224 | 8224 | 61 |
| AM_LREC-112 | Human clinical faeces | 2011 | Spain | O153 | H10 | 10 | A | 54 | 37605 | 37605 | 37605 | 37605 | 37605 | 37605 | 37600 | 37600 | 8224 | 8224 | 361 |
| AM_LREC-113 | Human clinical faeces | 2007 | Spain | O153 | H10 | 10 | A | 54 | **37606** | **37606** | **37606** | **37606** | **37606** | **37606** | 37600 | 37600 | 8224 | 8224 | 0 |
| AM_LREC-114 | Beef meat | 2008 | Spain | O153 | H10 | 10 | A | 54 | 37614 | 37614 | 37614 | 37614 | 37614 | 37600 | 37600 | 37600 | 8224 | 8224 | 20 |
| AM_LREC-115 | Chicken meat | 2009 | Spain | O153 | H10 | 10 | A | 54 | 37613 | 37613 | 37613 | 37613 | 37613 | 37613 | 37600 | 37600 | 8224 | 8224 | 101 |
| AM_LREC-116 | Human clinical faeces | 2006 | Spain | O153 | H10 | 10 | A | 54 | 37612 | 37612 | 37612 | 37612 | 37612 | **37606** | 37600 | 37600 | 8224 | 8224 | 22 |
| AM_LREC-117 | Beef meat | 2007 | Spain | O153 | H10 | 10 | A | 54 | 37609 | 37609 | 37609 | 37609 | 37609 | 37609 | 37600 | 37600 | 8224 | 8224 | 36 |
| AM_LREC-118 | Chicken breast | 2009 | Spain | O153 | H10 | 10 | A | 54 | 38299 | 38299 | 38299 | 38299 | 38299 | 37615 | 37600 | 37600 | 8224 | 8224 | 24 |
| AM_LREC-119 | Beef meat | 2007 | Spain | O153 | H10 | 10 | A | 54 | 37611 | 37611 | 37611 | 37611 | 37611 | **37606** | 37600 | 37600 | 8224 | 8224 | 15 |
| AM_LREC-120 | Beef meat | 2011 | Spain | - | H10 | 10 | A | 54 | 37607 | 37607 | 37607 | 37607 | 37607 | 37607 | 37600 | 37600 | 8224 | 8224 | 537 |
| AM_LREC-121 | Human clinical faeces | 2007 | Spain | - | H10 | 10 | A | 54 | 37610 | 37610 | 37610 | 37610 | 37610 | 37610 | 37600 | 37600 | 8224 | 8224 | 51 |
| AM_LREC-122 | Pork meat | 2011 | Spain | O153 | H10 | 10 | A | 54 | 37616 | 37616 | 37616 | 37616 | 37616 | 37615 | 37600 | 37600 | 8224 | 8224 | 28 |
| AM_LREC-123 | Chicken meat | 2010 | Spain | O153 | H10 | 10 | A | 54 | 37615 | 37615 | 37615 | 37615 | 37615 | 37615 | 37600 | 37600 | 8224 | 8224 | 25 |
| AM_LREC-124 | Human clinical faeces | 2007 | Spain | O153 | H10 | 10 | A | 54 | 37617 | 37617 | 37617 | 37617 | 37617 | **37606** | 37600 | 37600 | 8224 | 8224 | 31 |
| AM_LREC-125 | Beef meat | 2008 | Spain | O153 | H10 | 10 | A | 54 | 37618 | 37618 | 37618 | 37618 | 37618 | **37606** | 37600 | 37600 | 8224 | 8224 | 21 |
| AM_LREC-127 | Poultry farm environment | 2010 | Spain | O153 | H10 | 10 | A | 54 | 37602 | 37602 | 37602 | 37602 | 37602 | 37602 | 37600 | 37600 | 8224 | 8224 | 54 |
| E89 | Broiler; Liver | 2015 | Denmark | uncertain | H10 | 7003 | A | 54 | 36964 | 36964 | 36964 | 36964 | 36964 | 36964 | 36964 | 36964 | 8224 | 8224 |  |
| Escherichia coli  2312 | DNA | DNA | DNA | O40 | H10 | 10 | A | 54 | 8224 | 8224 | 8224 | 8224 | 8224 | 8224 | 8224 | 8224 | 8224 | 8224 |  |

a Data not available (DNA); b Not analyzed (NA); b SNPs of the core genomic regions present in 90% of the 17 compared genomes of our collection and using LREC-113 as reference

**Table S4.** Number of human stool samples analyzed and positive for aEPEC O153

| **Year** | **Nº stool samples** | **No. of positive samples (%)**  **for aEPEC O153** | **No. of positive samples (%)**  **for O153:H10 *eae*-beta1 *fimAVMT78*** |
| --- | --- | --- | --- |
| 2006 | 1,842 | 4 (0.22) | 1 ( 0.05) |
| 2007 | 2,095 | 11 (0.52) | 8 ( 0.4) |
| 2008 | 1,001 | 5 (0.50) | 3 (0.3) |
| 2009 | 550 | 0 (0) | 0 (0) |
| 2010 | 514 | 0 (0) | 0 (0) |
| 2011 | 1,207 | 2 (0.50) | 1 (0.08 ) |
| 2012 | 2314 | 1 (0.04) | 1 (0.04 ) |
| Total | 9,523 | 23 (0.14) | 14 (0.15) |

**Table S5.** Twenty-threeaEPEC O153 human isolates recovered in the period 2006-2012

| **Isolate code** | **Year of isolation** | **Symptomatology** | **O153 Serogroup** | **H10**  **Antigen** | ***eae***  **gene** | ***eae* beta-1**  **intimin** | ***fimH*AVMT78**  **gene** |
| --- | --- | --- | --- | --- | --- | --- | --- |
| 22250.06 | 2006 | Diarrhea | + | - | + | + | - |
| 37979. 06 | 2006 | Diarrhea | + | + | + | - | - |
| 41824. 06 | 2006 | Diarrhea | + | - | + | - | - |
| 45990. 06 (LREC 116)* | 2006 | Diarrhea | + | + | + | + | + |
| 57646. 06 | 2007 | Diarrhea | + | - | + | - | + |
| 18396.07 (LREC 124)* | 2007 | Diarrhea | + | + | + | + | + |
| 19979. 07 (LREC 113)* | 2007 | Diarrhea | + | + | + | + | + |
| 30981. 07 (LREC 121)* | 2007 | Diarrhea | + | + | + | + | + |
| 31952. 07 | 2007 | Diarrhea | + | + | + | + | + |
| 32182. 07 | 2007 | Diarrhea | + | - | + | - | - |
| 32651. 07 | 2007 | Hemorrhagic gastroenteritis | + | + | + | + | + |
| 32884. 07 | 2007 | Diarrhea | + | + | + | + | + |
| 34535. 07 | 2007 | Acute gastroenteritis | + | + | + | + | + |
| 39044. 07 | 2007 | Acute gastroenteritis | + | + | + | + | + |
| 65905/07 | 2007 | Hemorrhagic colitis | + | - | + | - | + |
| 110431.08 | 2008 | Hemorrhagic colitis | + | - | + | + | - |
| 2477.08 | 2008 | Diarrhea | + | - | + | - | - |
| 21011. 08 | 2008 | Diarrhea | + | + | + | + | + |
| 38506. 08 | 2008 | Diarrhea | + | + | + | + | + |
| 40237. 08 | 2008 | Diarrhea | + | + | + | + | + |
| 48633.11 | 2011 | Diarrhea | + | - | + | - | - |
| 9727.011 (LREC 112)* | 2011 | Hemorrhagic colitis | + | + | + | + | + |
| 55515.12 | 2012 | Diarrhea | + | + | + | + | + |

(*) code of those strains which were WG sequenced

**Table S6.** *in silico* characterization of seven *E. coli* related genomes from Enterobase using CGE databases

| **Name** | **Serotype** | **Phylo**  **group** | **CHType** | **ST** | **Plasmid content**  **Inc group (pMLST)** | **Acquired resistances** | **Virulence genes** |
| --- | --- | --- | --- | --- | --- | --- | --- |
| 866428 | O153:H10 | A | 11-54 | 10 | **IncF (F2:A-:B-)**  IncX1  Col156 | *aadA1; catA1; mdf(A); tet(A)* | *astA, eae, espA, espB, gad, iss, mchF, nleA, tir* |
| 853984 | O153:H10 | A | 11-54 | 10 | **IncF (F2:A-:B-)**  IncX1  Col156 | *aadA1; catA1; mdf(A); tet(A)* | *astA, eae, espA, espB, gad, iss, mchF, nleA, tir* |
| 166357 | O40:H10 | A | 11-54 | 10 | **IncF (F2:A-:B-)**  IncHI2 (ST4)  IncQ  Col156 | *blaTEM-1B; aph(3´´)-Ib, aph(3´)-Ia, aph(6)-Ib; catA1; mdf(A); florR; tet(A); sul2; dfrA8* | *astA, eae, espA, espB, gad, iss, mchF, nleA, nleC, tir* |
| *E. coli* 2312 | O40:H10 | A | 11-54 | 10 | **IncF (F2:A-:B-)**  IncI1 (STunknown)  Col156  Col (MG828) | *aac(3)-IV, aph(3´´)-Ib, aph(3´)-Ia, aph(4)-Ia, aph(6)-Ib; mdf(A); tet(A); sul2* | *astA, eae, espA, espB, gad, ireA, iss, mchF, nleA, nleC, tir* |
| E89 | ND:H10 | A | 11-54 | 10 | **IncF (F2:A-:B-)**  Col156 | *aadA1; mdf(A);* | *astA, eae, espA, espB, gad, iss, mchF, nleA, tir* |
| 208917 | O40:H10 | A | 11-54 | 10 | **IncF (F2:A-:B-)**  Col156 | *mdf(A)* | *astA, eae, espA, gad, ireA, mchF, nleA, nleC, tir* |
| 110084 | O5:H27 | A | 11-54 | 10 | IncF (F-:A-:B-)  pO111 | *aph(6)-Ib; mdf(A); sul2; dfrA8* | *astA, celB, eae, espA, gad, iss, mchF, nleA, tir* |

**Table S7.** Targets and primers associated with diarrheagenic pathotypes of *E. coli*

| **Pathotype** | **Target** | **Primers** | **Nucleotide sequence (5´- 3´)** | **Size (bp)** | **Reference** |
| --- | --- | --- | --- | --- | --- |
| STEC | *stx1* | VT1‐F | TCGCTGAATGTCATTCGCTCTGC | 539 | Mora et al., 2011 |
| VT1‐R | TCAGCAGTCATTACATAAGAAC |
| STEC | *stx2* | VT2‐F1 | TTTCTTCGGTATCCTATTCCC | 358 | Mora et al., 2011 |
| VT2‐F2 | TGTCTTCAGCATCTTATGCAG |
| VT2‐R | CTGCTGTCCGTTGTCATGGAA |
| EPEC | *eae* | EAE-V3F | CATTGATCAGGATTTTTCTGGT | 510 | Mora et al., 2011 |
| EAE-MBR | TCCAGAATAATATTGTTATTACG |
| EPEC | *eae* | aEAE-R11 | TCTTCGGAGGGTTTTTTATT | 1125 | Alonso et al., 2017 |
| aEAE-FBN | CAGGTCGTCGTGTCTGCTAAAAC |
| EPEC | *eae* | aEAE-R12 | CCAGACGAATATATACATATTC | 1181 | Alonso et al., 2017 |
| aEAE-FBN | CAGGTCGTCGTGTCTGCTAAAAC |
| tEPEC | *bfp* | BFP-NF1 | ATGGTTTCTAAAATCATGAATAAG | 262 | Bennett, 2003  García-Meniño et al., 2018 |
| BFP-NR1 | ATTATTCCGGAATTGCAGATGTGT |
| ETEC | *estA* | STa-A | ATTTTTATTTCTGTATTGTCTTT | 176 | Penteado et al., 2002 |
| STa-B | GGATTACAACACAGTTCACAGCAGT |
| ETEC | *estB* | Stb-F | ATCGCATTTCTTCTTGCATC | 175 | Blanco et al., 1997 |
| Stb-R | GGGCGCCAAAGCATGCTCC |
| ETEC | *eltA* | LT-A-1 | GGCGACAGATTATACCGTGC | 696 | Schultsz et al., 1994 |
| LT-A-2 | CCGAATTCTGTTATATATGTC |
| EIEC | *ipaH* | EI1 | GCTGGAAAAACTCAGTGCCT | 424 | Tornieporth et al., 1995 |
| EI2 | CCAGTCCGTAAATTCATTCT |
| EAEC | *aatA* | pCVD432/start | CTGGCGAAAGACTGTATCAT | 630 | Schmidt et al., 1995 |
| pCVD432/stop | CAATGTATAGAAATCCGCTGTT |

a Primers used for sequencing

Table S8. Targets and primers associated with extraintestinal pathotypes of *E. coli*

| **Pathotype** | **Target** | **Primers** | **Nucleotide sequence (5´- 3´)** | **Size**  **(bp)** | **Reference** |
| --- | --- | --- | --- | --- | --- |
| ExPEC | *kpsM II* | KpsII f | GCGCATTTGCTGATACTGTTG | 272 | Johnson & Stell, 2000 |
| KpsII r | CATCCAGACGATAAGCATGAGCA |
| ExPEC | *kpsM II-K2* | kpsII f | GCGCATTTGCTGATACTGTTG | 570 | Johnson & O’Bryan, 2004 |
| KpsII-K2r | AGGTAGTTCAGACTCACACCT |
| ExPEC | *kpsM II-K5* | K5 f | CAGTATCAGCAATCGTTCTGTA | 159 | Johnson & Stell, 2000 |
| kpsII r | CATCCAGACGATAAGCATGAGCA |
| ExPEC | *neuC-K1* | neu1 | AGGTGAAAAGCCTGGTAGTGTG | 676 | Moulin-Schouleur et al., 2006 |
| neu2 | GGTGGTACATCCCGGGATGTC |
| ExPEC | *kpsM III* | kps III f | TCCTCTTGCTACTATTCCCCCT | 392 | Johnson & Stell, 2000 |
| kps III r | AGGCGTATCCATCCCTCCTAAC |
| ExPEC | *cvaC* | CoIV-Cf | CACACACAAACGGGAGCTGTT | 680 | Johnson & Stell, 2000 |
| CoIV-Cr | CTTCCCGCAGCATAGTTCCAT |
| ExPEC | *ibeA* | Ibe10 f | AGGCAGGTGTGCGCCGCGTAC | 170 | Johnson & Stell, 2000 |
| Ibe10 r | TGGTGCTCCGGCAAACCATGC |
| ExPEC | *iss* | is-f | CAGCAACCCGAACCACTTGATG | 323 | Johnson et al., 2008 |
| is-r | AGCATTGCCAGAGCGGCAGAA |
| ExPEC | *malX* | MALX-F | GCATGAGCAGTGCGATACATCGC | 828 | Mora et al., 2013 |
| MALX-R | AGGGCTGGGAAGTGGTTTAGCC |
| ExPEC | *traT* | TraTf | GGTGTGGTGCGATGAGCACAG | 290 | Johnson & Stell, 2000 |
| TraTr | CACGGTTCAGCCATCCCTGAG |
| ExPEC | *tsh* | tsh03 | GGTGGTGCACTGGAGTGG | 640 | Dozois et al., 2000 |
| tsh15 | AGTCCAGCGTGATAGTGG |
| ExPEC | *usp* | usp-f | ACATTCACGGCAAGCCTCAG | 440 | Bauer et al., 2002 |
| usp-r | AGCGAGTTCCTGGTGAAAGC |
| ExPEC | *fimH* | FimH F | TGCAGAACGGATAAGCCGTGG | 508 | Johnson & Stell, 2000 |
| FimH R | GCAGTCACCTGCCCTCCGGTA |
| ExPEC | *fimAvMT78* | fimA215 | ACTTTAGGATGAGTACTG | 266 | Marc & Dho-Moulin, 1996 |
| fimA201 | TCTGGCTGATACTACACC |
| ExPEC | *papC* | Forward | GTGGCAGTATGAGTAATGACCGTTA | 205 | Johnson et al., 2015 |
| Reverse | ATATCCTTTCTGCAGGGATGCAATA |
| ExPEC | *sfa/focDE* | sfa 1 | CTCCGGAGAACTGGGTGCATCTTAC | 410 | Le Bouguenec et al., 1992 |
| sfa 2 | CGGAGGAGTAATTACAAACCTGGCA |
| ExPEC | *afa/draBC* | afa1 | GCTGGGCAGCAAACTGATAACTCTC | 750 | Le Bouguenec et al., 1992 |
| afa2 | CATCAAGCTGTTTGTTCGTCCGCCG |
| ExPEC | *cnf 1* | CNF1-F2 | CAGGAGGTACTTAGCAGCGT | 468 | Mora et al., 2013 |
| CNF1-RC | TAATTTTGGGTTTGTATC |
| ExPEC | *cdtB* | cdt-s1 | GAAAGTAAATGGAATATAAATGTCCG | 466 | Tóth et al., 2003 |
| cdt-as1 | AAATCTCCTGCAATCATCCAGTTA |
| cdt-s2 | GAAAATAAATGGAACACACATGTCCG |
| cdt-as2 | AAATCACCAAGAATCATCCAGTTA |
| ExPEC | *hlyA* | hly f | AACAAGGATAAGCACTGTTCTGGCT | 1177 | Yamamoto et al., 1995 |
| hly r | ACCATATAAGCGGTCATTCCCGTCA |
| ExPEC | *sat* | SatF | GCAGCTACCGCAATAGGAGGT | 937 | Johnson et al., 2003 |
| SatR | CATTCAGAGTACCGGGGCCTA |
| ExPEC | *iucD* | Aer f | TACCGGATTGTCATATGCAGACCGT | 602 | Yamamoto et al., 1995 |
| Aer r | AATATCTTCCTCCAGTCCGGAGAAG |
| ExPEC | *iro*N | Ironec-f | AAGTCAAAGCAGGGGTTGCCCG | 665 | Johnson et al., 2000 |
| Ironec-r | GACGCCGACATTAAGACGCAG |

**Table S9.** Detection and sequencing of *bla*TEM, *bla*SHV and *bla*CTX-M genes

| **Target** | **Primers** | **Nucleotide sequence (5´- 3´)** | **Size (bp)** | **Reference** |
| --- | --- | --- | --- | --- |
| *bla*CTX‐M | CTX-C3 | ATGTGCAGCACCAGTAAAGTGATG | 542 | Mora et al., 2013 |
| CTX-C4 | ACCGCGATATCGTTGGTGGTGCC |
| *bla*CTX‐M-grupo 1 | M13U | GGTTAAAAAATCACTGCGTC | 863 | Saladin et al., 2002 |
| M13L | TTGGTGACGATTTTAGCCGC |
| *bla*CTX‐M-grupo 1 | aCTX-15-F1 | GAAGCTAATAAAAAACACACGTGG | 1044-1123 | Mora et al., 2013 |
| aCTX-15-R | GTATGCGCAAGCGCAGGTGG |
| *bla*SHV | SHV-F2 | TTGTCGCTTCTTTACTCGCC | 879 | Mora et al., 2013 |
| SHV-R2 | CCCGGCGATTTGCTGATTTCGC |
| *bla*SHV | aSHV-1 | GGGTTATTCTTATTTGTCGC | 930 | Rasheed et al., 1997 |
| aSHV-2 | TTAGCGTTGCCAGTGCTC |
| *bla*TEM | bTEM-1F | ATGAGTATTCAACATTTCCG | 868 | Rasheed et al., 1997 |
| bTEM-1R | CTGACAGTTACCAATGCTTA |

a Primers used for sequencing; b Primers used for amplification and sequencing

**Figure S1.** GrapeTree inferred using the NINJA NJ algorithm and based on the cgMLST V1 + HierCC V1 scheme from Enterobase


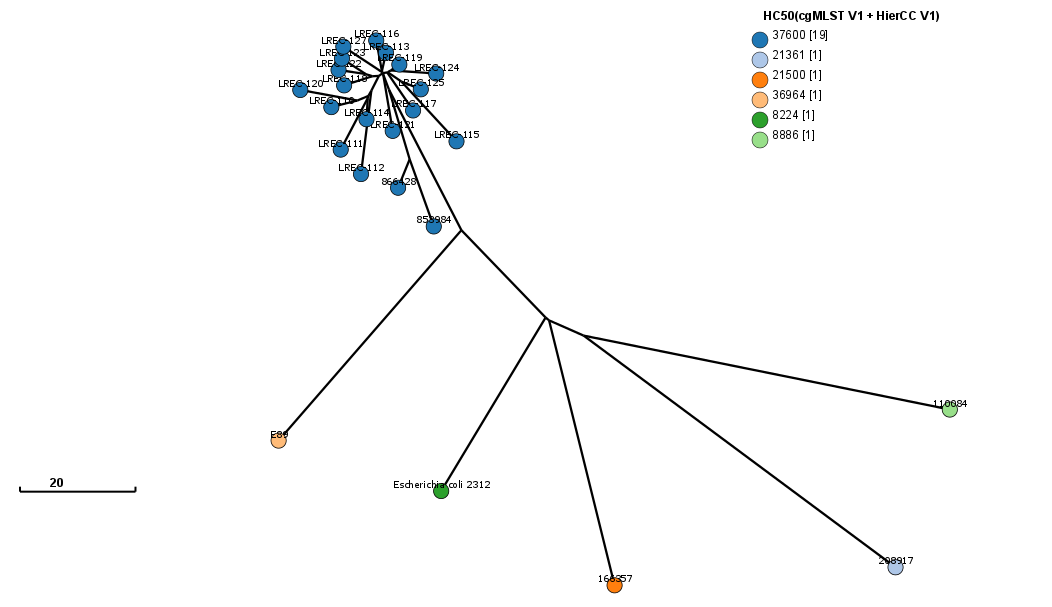


**References**

Alonso, C. A., Mora, A., Díaz, D., Blanco, M., González-Barrio, D., Ruiz-Fons, F., … Torres, C. (2017). Occurrence and characterization of stx and/or eae -positive Escherichia coli isolated from wildlife, including a typical EPEC strain from a wild boar. Veterinary Microbiology, 207, 69–73. https://doi.org/10.1016/j.vetmic.2017.05.028

Bauer, R. J., Zhang, L., Foxman, B., Siitonen, A., Jantunen, M. E., Saxen, H., & Marrs, C. F. (2002). Molecular Epidemiology of 3 Putative Virulence Genes for Escherichia coli Urinary Tract Infection— usp, iha, and iroN E. coli . The Journal of Infectious Diseases, 185(10), 1521–1524. https://doi.org/10.1086/340206

Bennett. (2003). Classical enteropathogenic Escherrichia coli or atypical strains? Examination of shigatoxin negative, eaeA positive isolates received in the Enteric Reference Laboratory in 2000. New Zealand Journal of Medical Laboratory Science, 57(1):2-7.

Blanco, M., Blanco, J. E., Gonzalez, E. A., Mora, A., Jansen, W., Gomes, T. A., … Blanco, J. (1997). Genes coding for enterotoxins and verotoxins in porcine Escherichia coli strains belonging to different O:K:H serotypes: relationship with toxic phenotypes. Journal of Clinical Microbiology, 35(11), 2958–2963. Retrieved from http://www.ncbi.nlm.nih.gov/pubmed/9350767

Dozois, C. M., Dho-Moulin, M., Brée, A., Fairbrother, J. M., Desautels, C., & Curtiss, R. (2000). Relationship between the Tsh autotransporter and pathogenicity of avian Escherichia coli and localization and analysis of the Tsh genetic region. Infection and Immunity, 68(7), 4145–4154. Retrieved from http://www.ncbi.nlm.nih.gov/pubmed/10858231

García-Meniño, I., García, V., Mora, A., Díaz-Jiménez, D., Flament-Simon, S. C., Alonso, M. P., … Blanco, J. (2018). Swine Enteric Colibacillosis in Spain: Pathogenic Potential of mcr-1 ST10 and ST131 E. coli Isolates. Frontiers in Microbiology, 9, 2659. https://doi.org/10.3389/fmicb.2018.02659

Johnson, J. R., Gajewski, A., Lesse, A. J., & Russo, T. A. (2003). Extraintestinal pathogenic Escherichia coli as a cause of invasive nonurinary infections. Journal of Clinical Microbiology, 41(12), 5798–5802. Retrieved from http://www.ncbi.nlm.nih.gov/pubmed/14662987

Johnson, J. R., & O’Bryan, T. T. (2004). Detection of the Escherichia coli group 2 polysaccharide capsule synthesis Gene kpsM by a rapid and specific PCR-based assay. Journal of Clinical Microbiology, 42(4), 1773–1776. Retrieved from http://www.ncbi.nlm.nih.gov/pubmed/15071046

Johnson, J. R., Porter, S., Johnston, B., Kuskowski, M. A., Spurbeck, R. R., Mobley, H. L. T., & Williamson, D. A. (2015). Host Characteristics and Bacterial Traits Predict Experimental Virulence for Escherichia coli Bloodstream Isolates From Patients With Urosepsis. Open Forum Infectious Diseases, 2(3), ofv083. https://doi.org/10.1093/ofid/ofv083

Johnson, J. R., Russo, T. A., Tarr, P. I., Carlino, U., Bilge, S. S., Vary, J. C., & Stell, A. L. (2000). Molecular epidemiological and phylogenetic associations of two novel putative virulence genes, iha and iroN(E. coli), among Escherichia coli isolates from patients with urosepsis. Infection and Immunity, 68(5), 3040–3047. Retrieved from http://www.ncbi.nlm.nih.gov/pubmed/10769012

Johnson, J. R., & Stell, A. L. (2000). Extended virulence genotypes of Escherichia coli strains from patients with urosepsis in relation to phylogeny and host compromise. The Journal of Infectious Diseases, 181(1), 261–272. https://doi.org/10.1086/315217

Johnson, T. J., Wannemuehler, Y. M., & Nolan, L. K. (2008). Evolution of the iss Gene in Escherichia coli. Applied and Environmental Microbiology, 74(8), 2360–2369. https://doi.org/10.1128/AEM.02634-07

Le Bouguenec, C., Archambaud, M., & Labigne, A. (1992). Rapid and specific detection of the pap, afa, and sfa adhesin-encoding operons in uropathogenic Escherichia coli strains by polymerase chain reaction. Journal of Clinical Microbiology, 30(5), 1189–1193. Retrieved from http://www.ncbi.nlm.nih.gov/pubmed/1349900

Marc, D., & Dho-Moulin, M. (1996). Analysis of the fim cluster of an avian O2 strain of Escherichia coli: serogroup-specific sites within fimA and nucleotide sequence of fimI. Journal of Medical Microbiology, 44(6), 444–452. https://doi.org/10.1099/00222615-44-6-444

Mora, A., Herrrera, A., López, C., Dahbi, G., Mamani, R., Pita, J. M., … Blanco, J. (2011). Characteristics of the Shiga-toxin-producing enteroaggregative Escherichia coli O104:H4 German outbreak strain and of STEC strains isolated in Spain. International Microbiology : The Official Journal of the Spanish Society for Microbiology, 14(3), 121–141. https://doi.org/10.2436/20.1501.01.142

Mora, A., Viso, S., López, C., Alonso, M. P., García-Garrote, F., Dabhi, G., … Blanco, J. (2013). Poultry as reservoir for extraintestinal pathogenic Escherichia coli O45:K1:H7-B2-ST95 in humans. Veterinary Microbiology, 167(3–4), 506–512. https://doi.org/10.1016/j.vetmic.2013.08.007

Moulin-Schouleur, M., Schouler, C., Tailliez, P., Kao, M.-R., Brée, A., Germon, P., … Blanco, J. (2006). Common virulence factors and genetic relationships between O18:K1:H7 Escherichia coli isolates of human and avian origin. Journal of Clinical Microbiology, 44(10), 3484–3492. https://doi.org/10.1128/JCM.00548-06

Penteado, A. S., Ugrinovich, L. A., Blanco, J., Blanco, M., Blanco, J. E., Mora, A., … Pestana de Castro, A. F. (2002). Serobiotypes and virulence genes of Escherichia coli strains isolated from diarrheic and healthy rabbits in Brazil. Veterinary Microbiology, 89(1), 41–51. Retrieved from http://www.ncbi.nlm.nih.gov/pubmed/12223161

Rasheed, J. K., Jay, C., Metchock, B., Berkowitz, F., Weigel, L., Crellin, J., … Tenover, F. C. (1997). Evolution of extended-spectrum beta-lactam resistance (SHV-8) in a strain of Escherichia coli during multiple episodes of bacteremia. Antimicrobial Agents and Chemotherapy, 41(3), 647–653. Retrieved from http://www.ncbi.nlm.nih.gov/pubmed/9056008

Saladin, M., Cao, V. T. B., Lambert, T., Donay, J.-L., Herrmann, J.-L., Ould-Hocine, Z., … Arlet, G. (2002). Diversity of CTX-M beta-lactamases and their promoter regions from Enterobacteriaceae isolated in three Parisian hospitals. FEMS Microbiology Letters, 209(2), 161–168. https://doi.org/10.1111/j.1574-6968.2002.tb11126.x

Schmidt, H., Knop, C., Franke, S., Aleksic, S., Heesemann, J., & Karch, H. (1995). Development of PCR for screening of enteroaggregative Escherichia coli. Journal of Clinical Microbiology, 33(3), 701–705. Retrieved from http://www.ncbi.nlm.nih.gov/pubmed/7751380

Schultsz, C., Pool, G. J., van Ketel, R., de Wever, B., Speelman, P., & Dankert, J. (1994). Detection of enterotoxigenic Escherichia coli in stool samples by using nonradioactively labeled oligonucleotide DNA probes and PCR. Journal of Clinical Microbiology, 32(10), 2393–2397. Retrieved from http://www.ncbi.nlm.nih.gov/pubmed/7814472

Tornieporth, N. G., John, J., Salgado, K., de Jesus, P., Latham, E., Melo, M. C., … Riley, L. W. (1995). Differentiation of pathogenic Escherichia coli strains in Brazilian children by PCR. Journal of Clinical Microbiology, 33(5), 1371–1374. Retrieved from http://www.ncbi.nlm.nih.gov/pubmed/7615758

Tóth, I., Hérault, F., Beutin, L., & Oswald, E. (2003). Production of cytolethal distending toxins by pathogenic Escherichia coli strains isolated from human and animal sources: establishment of the existence of a new cdt variant (Type IV). Journal of Clinical Microbiology, 41(9), 4285–4291. Retrieved from http://www.ncbi.nlm.nih.gov/pubmed/12958258

Yamamoto, S., Terai, A., Yuri, K., Kurazono, H., Takeda, Y., & Yoshida, O. (1995). Detection of urovirulence factors in Escherichia coli by multiplex polymerase chain reaction. FEMS Immunology and Medical Microbiology, 12(2), 85–90. https://doi.org/10.1111/j.1574-695X.1995.tb00179.
